# Supplementary material for: Fabrication of AgBr nanomaterials as excellent antibacterial agents
Source: Royal Society of Chemistry journal article supplement (doi:10.1039/c5ra12575h), 2015-01-01
Supplement: c5ra12575h1.pdf [file c5ra12575h1.pdf]

**Supporting Information**

**for**

**Fabrication of AgBr Nanomaterials As  
Excellent Antibacterial Agent**

---

<sup>a</sup> *Key Laboratory of Microsystems and Micronanostructures Manufacturing (Ministry of Education), Harbin Institute of Technology, Harbin 150080, P. R. China.*

<sup>b</sup> *School of Life Science and Technology, Harbin Institute of Technology, Harbin, 150080, P. R. China.*

E-mail: shaoqinliu@hit.edu.cn; chongshenguo@hit.edu.cn; Tel;+86 451 86403493

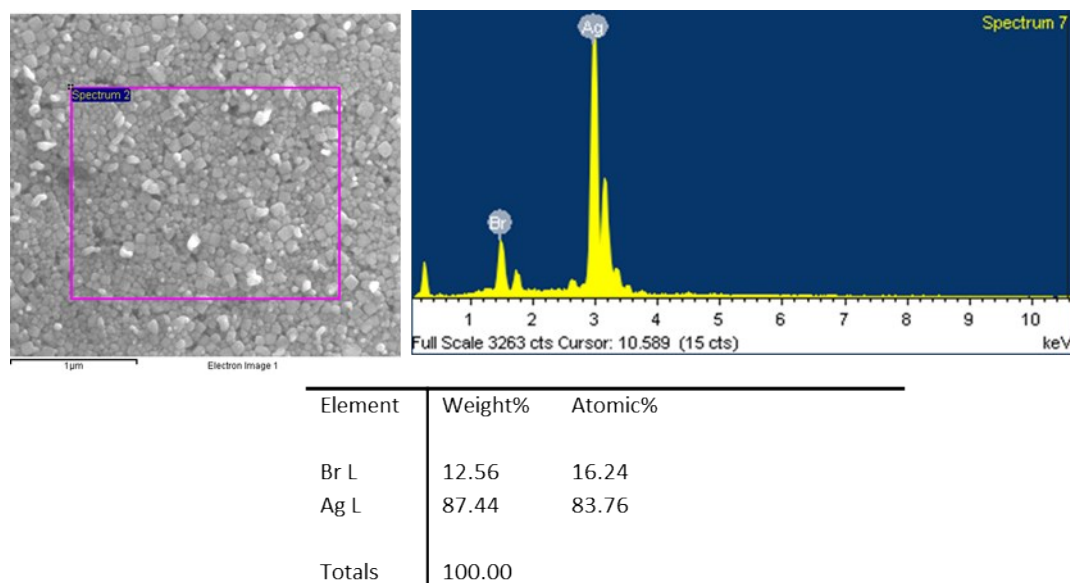

Fig. S1 EDS analysis on Ag@AgBr nanocubes

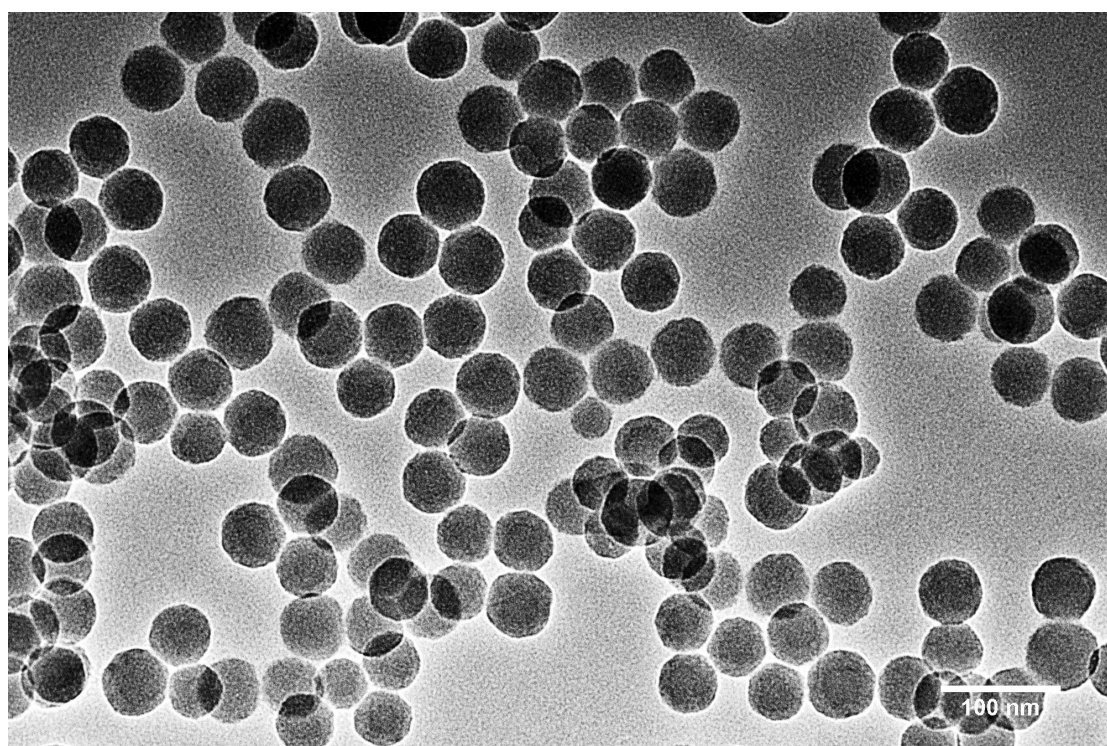

Fig. S2 TEM image of SiO<sub>2</sub> used as control in this work
